# Supplementary material for: Oceanic bromoform emissions weighted by their ozone depletion potential
Source: Copernicus journal article supplement (doi:10.5194/acp-15-13647-2015), 2015-12-10
Supplement: Supplementary file 1 [file acp-15-13647-2015-supplement.pdf]

Supplement of Atmos. Chem. Phys., 15, 13647–13663, 2015  
<http://www.atmos-chem-phys.net/15/13647/2015/>  
doi:10.5194/acp-15-13647-2015-supplement  
© Author(s) 2015. CC Attribution 3.0 License.

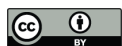

Atmospheric  
Chemistry  
and Physics  
Open Access  
EGU

*Supplement of*

## **Oceanic bromoform emissions weighted by their ozone depletion potential**

**S. Tegtmeier et al.**

*Correspondence to:* S. Tegtmeier (stegtmeier@geomar.de)

The copyright of individual parts of the supplement might differ from the CC-BY 3.0 licence.

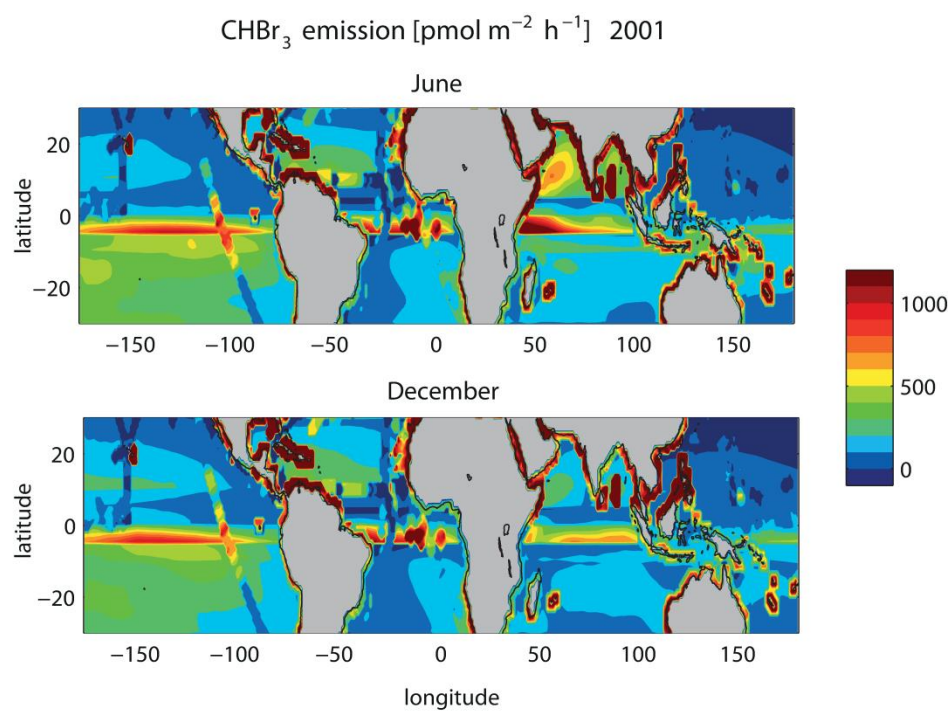

**Figure S1:** Global CHBr<sub>3</sub> emissions derived as bottom-up estimates based on the extrapolation of in-situ measurements (Ziska et al., 2013) are displayed for June and December 2001.
